# Supplementary figures and images for: The yeast noncoding RNA interaction network
Source: PubMed Central journal article supplement — RNA. 2017 Oct;23(10):1479–92. doi: 10.1261/rna.060996.117 (PMC5602107; doi:10.1261/rna.060996.117), 2017-10

# Degree distribution (Human)

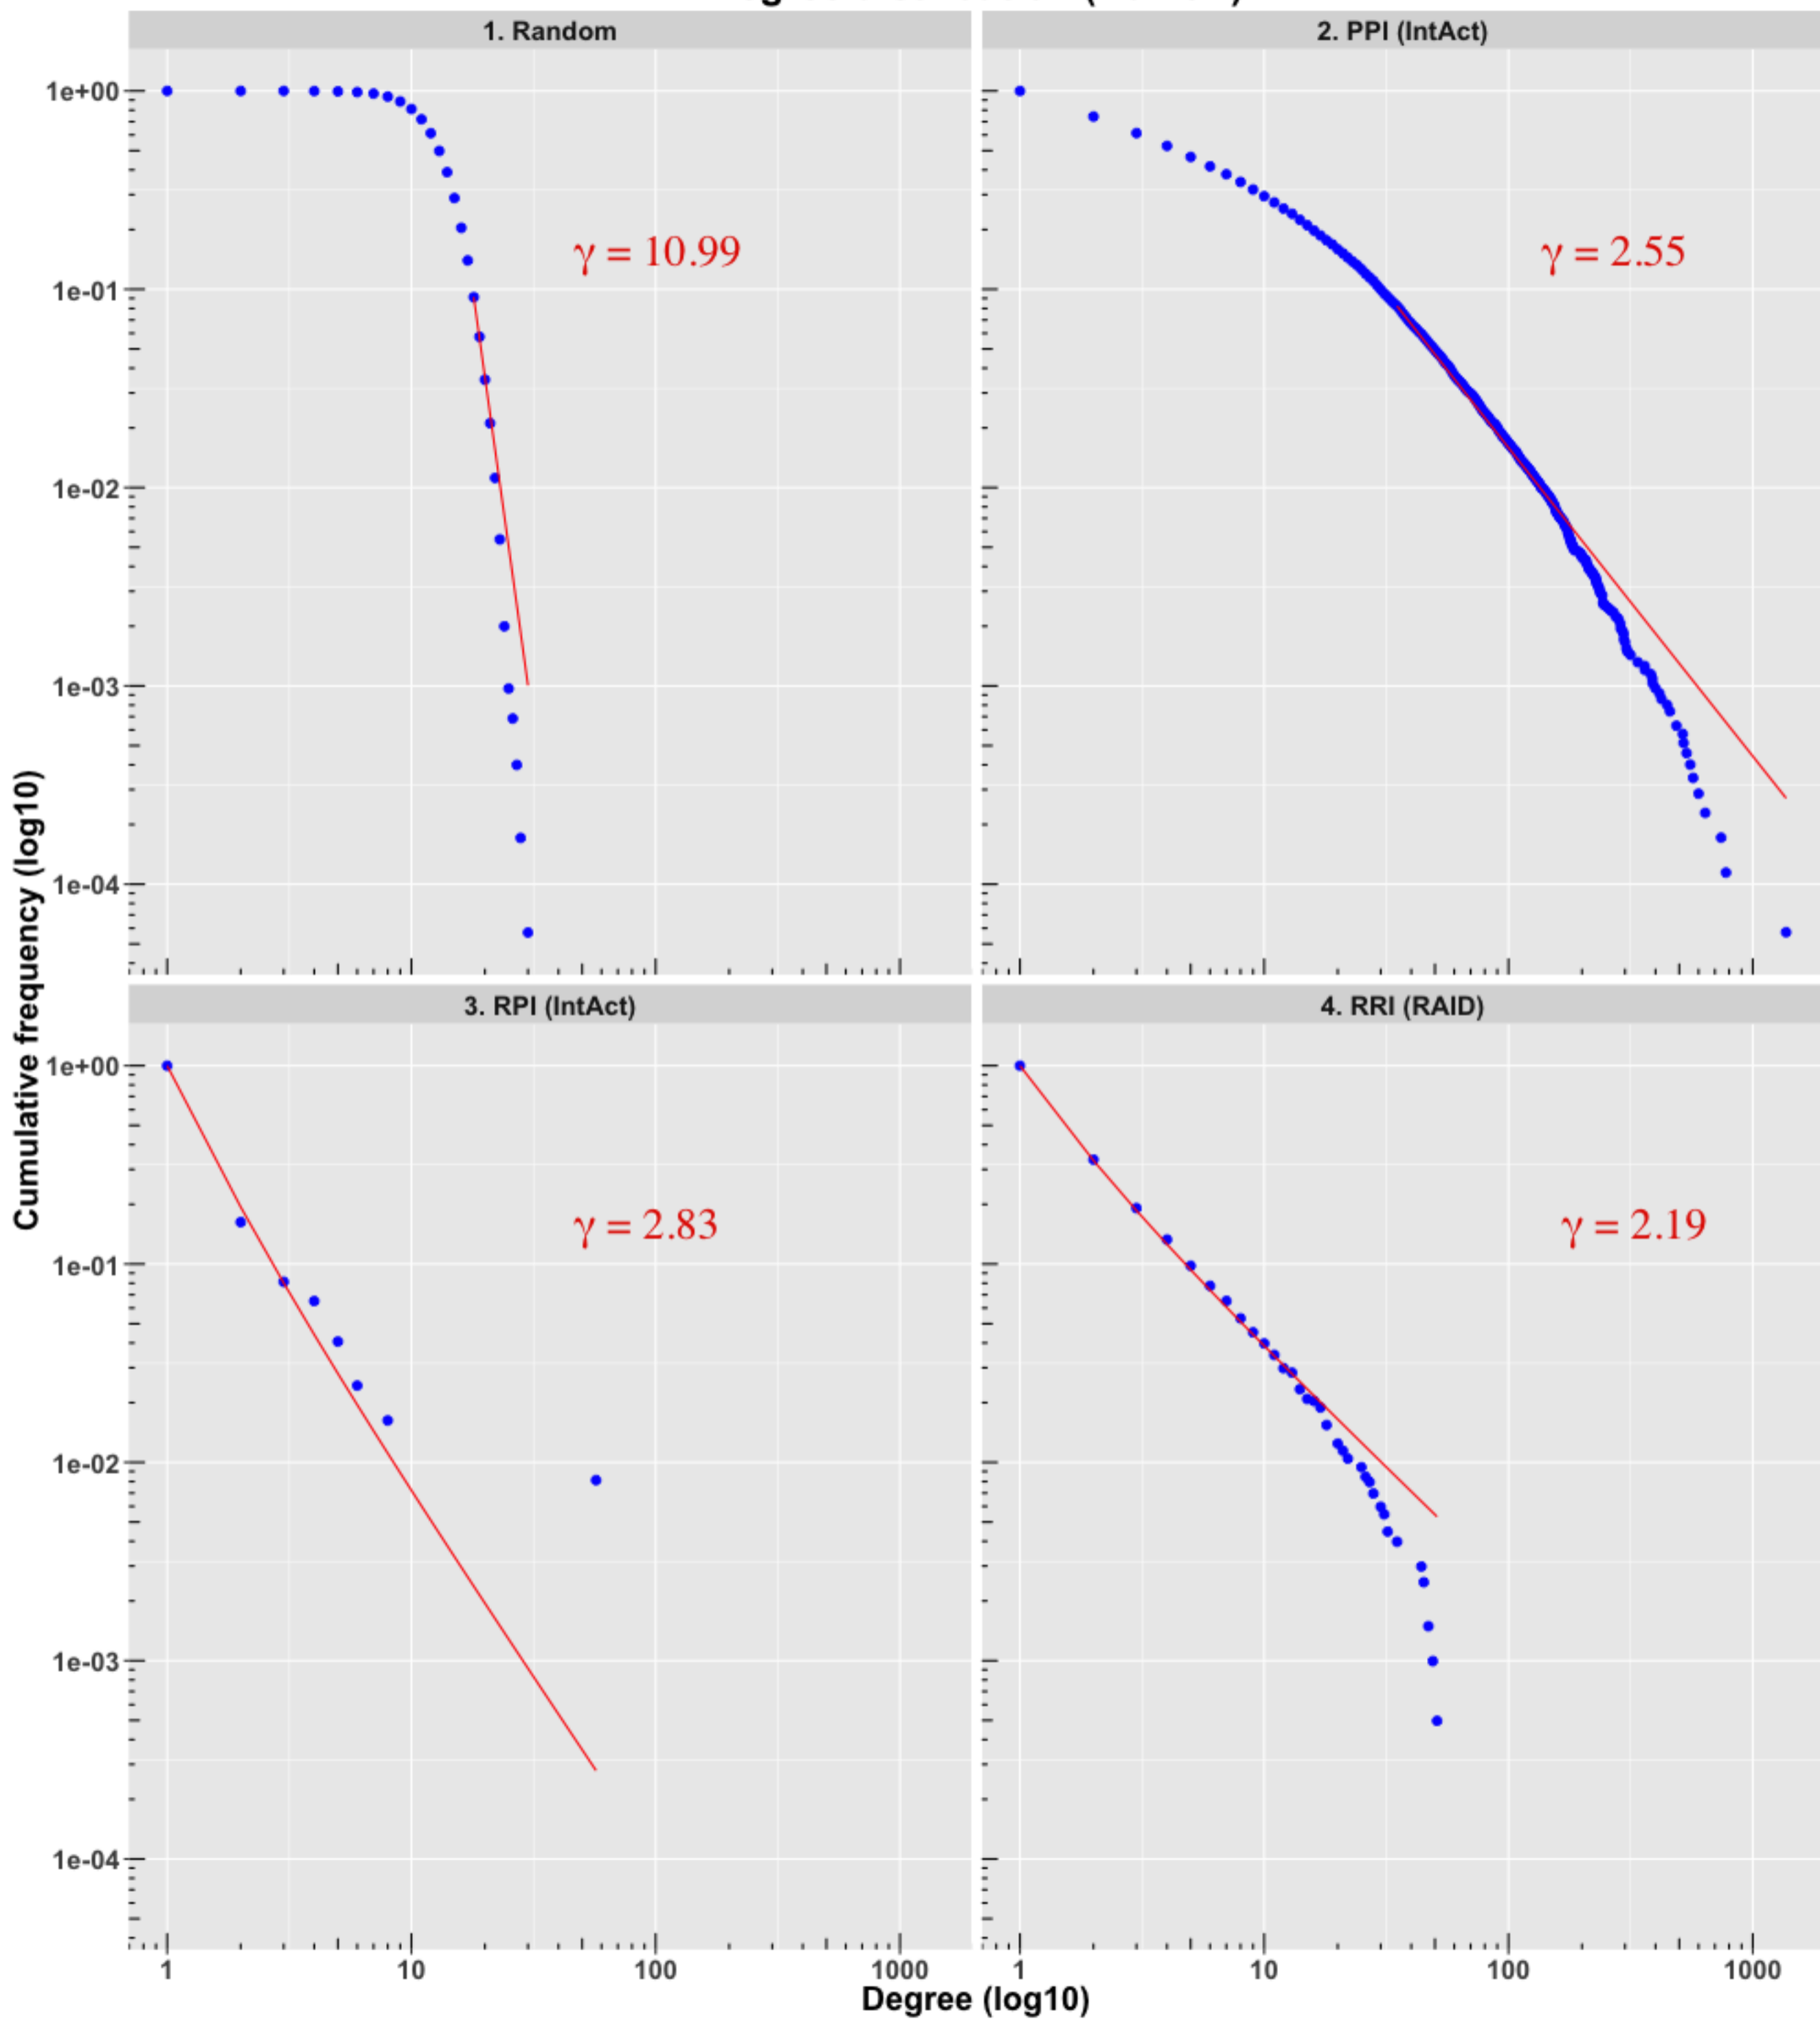

Supplement: supp_060996.117_Supplemental_Fig_S1.pdf [file supp_060996.117_Supplemental_Fig_S1.pdf]
